# Supplementary material
Source: Springer Nature journal article supplement (https://www.springerprofessional.de/resource/supplementary/40493_2013_7_MOESM6_ESM.pdf/11899618)

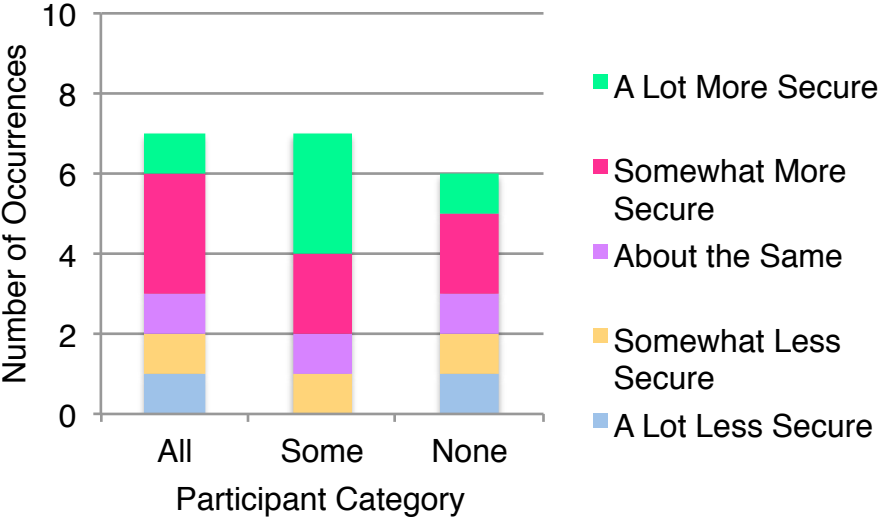

Supplement: MOESM6 [file 11899618]
